# Supplementary material
Source: PubMed Central journal article supplement (PMC4475455)
Supplement: NIHMS684975-supplement-1.pdf [file NIHMS684975-supplement-1.pdf]

# Supplemental Figure 1

## Stolberg et al.

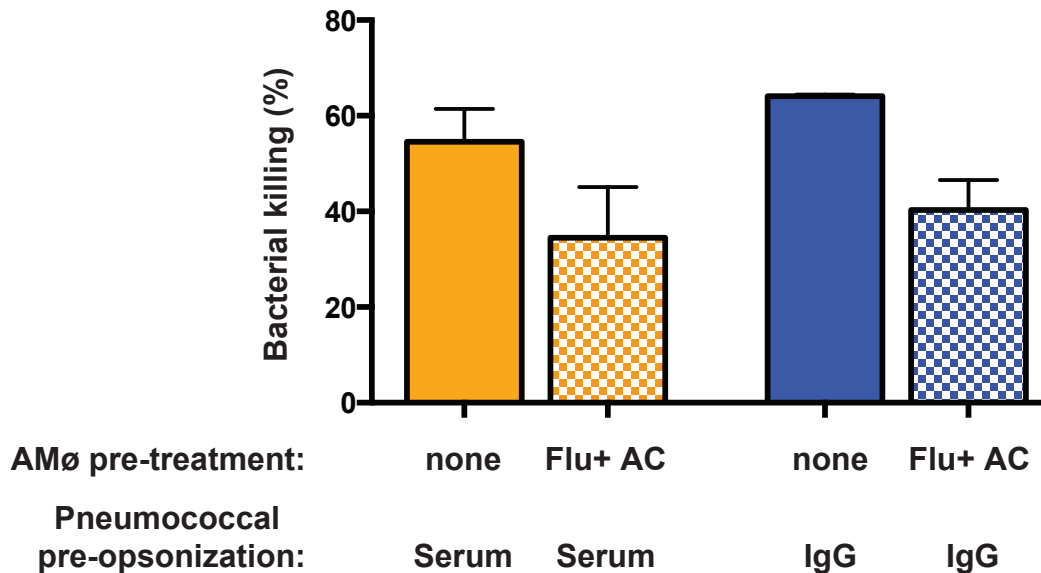

**Supplemental Figure 1. The suppressive effect of GCAE on in vitro killing is seen whether pneumococci are opsonized using fresh rat serum or specific murine anti-IgG.** Adherence-purified AMø from normal C57BL/6 mice were pre-treated with media alone (none) or 2  $\mu$ M fluticasone for 22 h followed by AC (at a ratio of 10:1 relative to AMø) for 2h (Flu + AC). Viable pneumococci strain 3 were opsonized by incubation for 1 h at 37°C with constant shaking, either with normal rat serum (10% in Hank's Balanced Salt Solution) that had not been heat-in-activated (as a source of complement and other innate opsonins) (serum), or with specific mouse anti-pneumococcal IgG at 20  $\mu$ g/ml (Abcam, Cambridge, MA) (IgG). Next, pneumococci were added ( $2 \times 10^6$  CFU/well), and bacterial killing was assayed as described in Material & Methods. Data are expressed as the percentage of bacterial killing. Results are mean  $\pm$  SEM of a single experiment using pooled AMø from four mice. There was no significant difference between serum-opsonization and Ig-opsonization by unpaired two-tailed t test.

## Supplemental Figure 2 Stolberg et al.

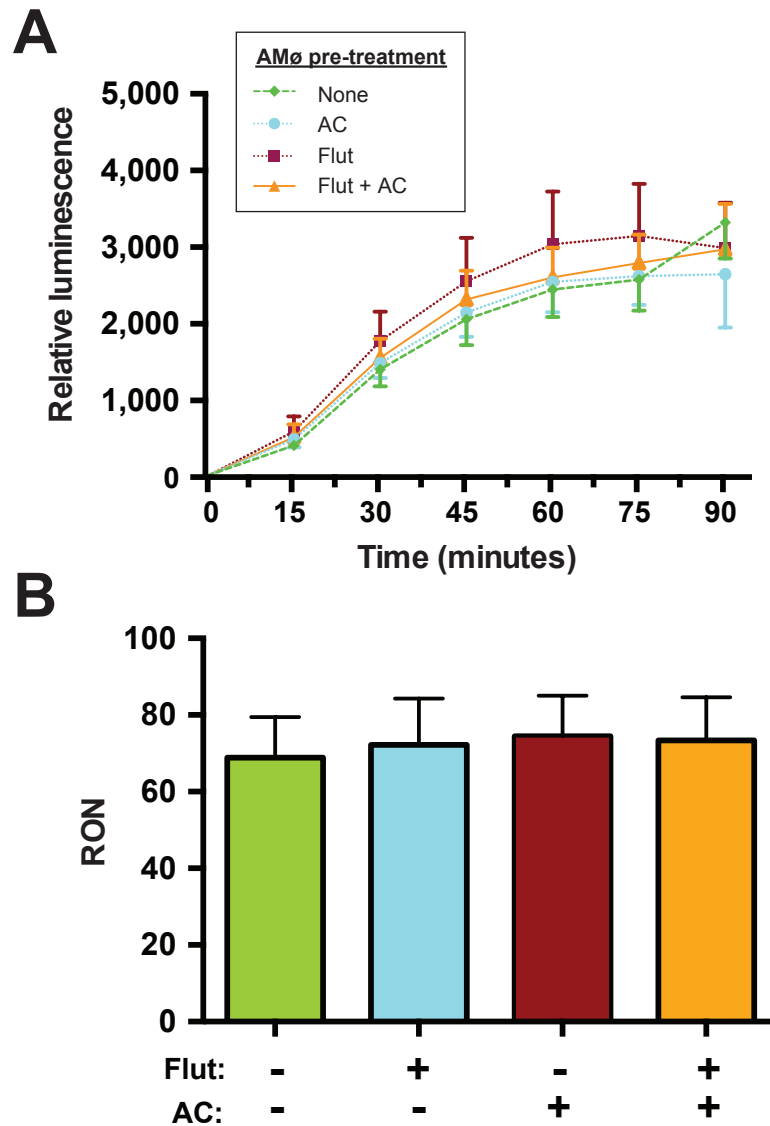

**Supplemental Figure 2. GCAE does not significantly impair in vitro murine AMØ production of reactive oxygen species (ROS) or reactive nitrogen species (RNS) in response to viable pneumococci.** Adherence-purified AMØ from normal C57BL/6 mice were pre-treated with media alone (none), 2 µM fluticasone for 22 h (Flu), AC (at a ratio of 10 AC/AMØ) for 2 h (AC); or 2 µM fluticasone for 22 h followed by AC for 2h (Flu + AC) as described in the Supplemental Methods. Next, pneumococci were added ( $2 \times 10^6$  CFU/well). (A) ROS was assayed via fluorescent plate reader every 15 mins for a total of 90 mins and (B) RNS was assayed at 2 h. Data are expressed as the relative luminescence. Results are mean  $\pm$  SEM of two experiments for ROS assay and three experiments for RNS assay, each using pooled AMØ from four to five mice. There were no significant differences between the conditions.
